# Supplementary material
Source: PubMed Central journal article supplement (PMC1550311)
Supplement: bj3980303add.pdf [file bj3980303add.pdf]

A

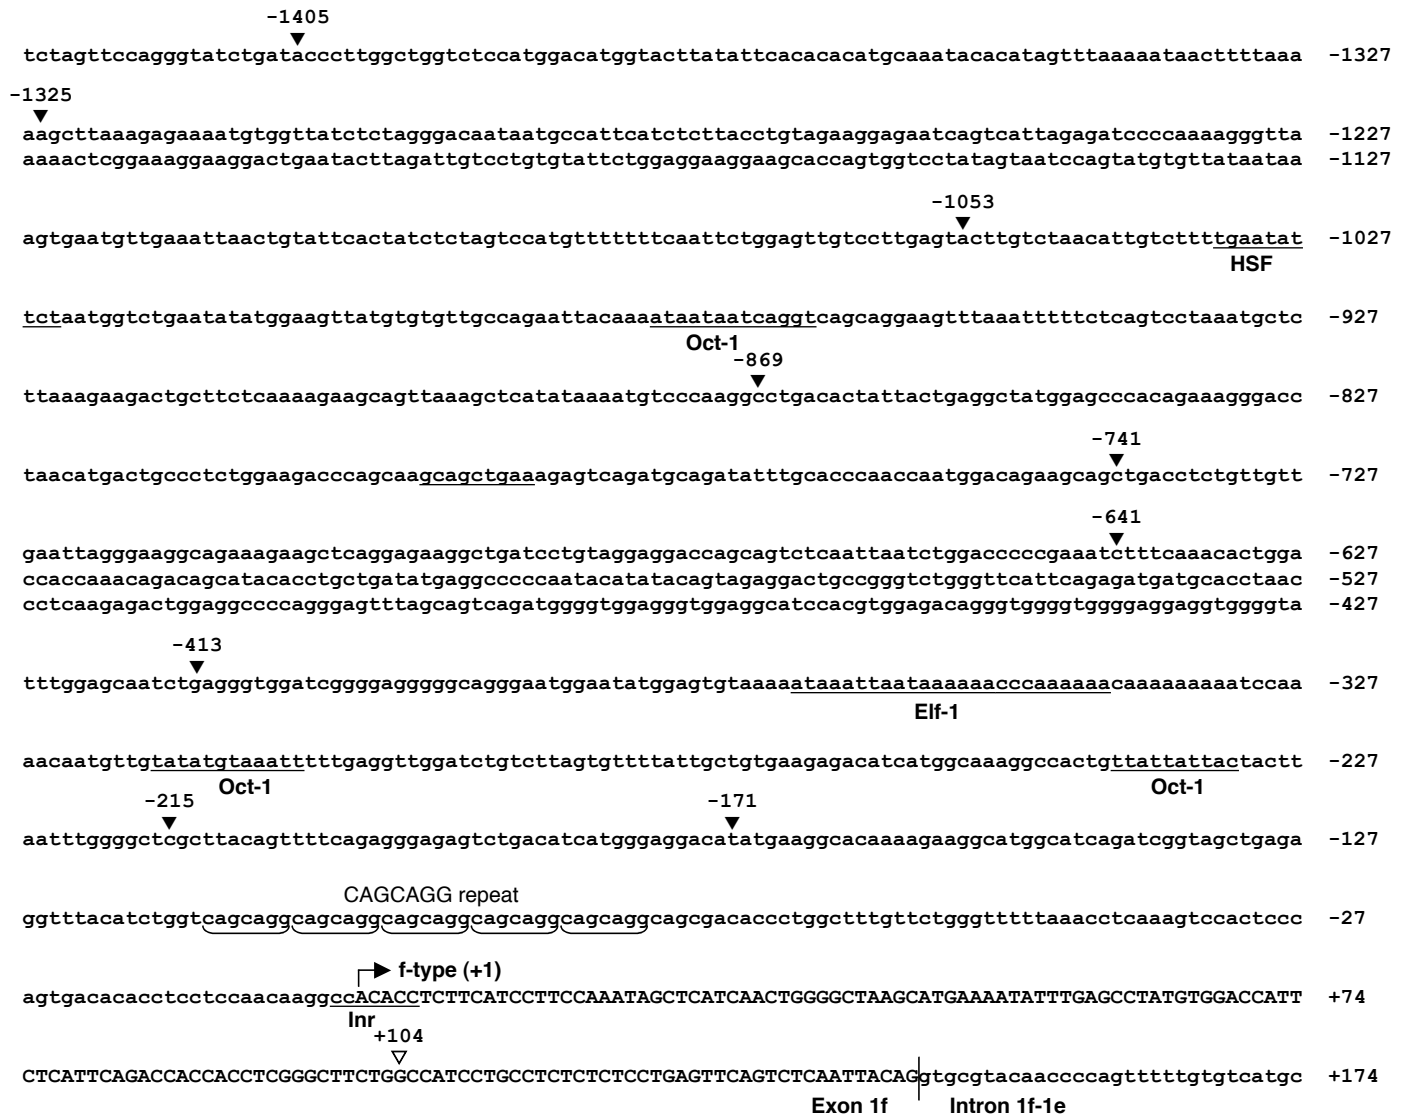

Online Figure IA. Arakawa et al.

# B

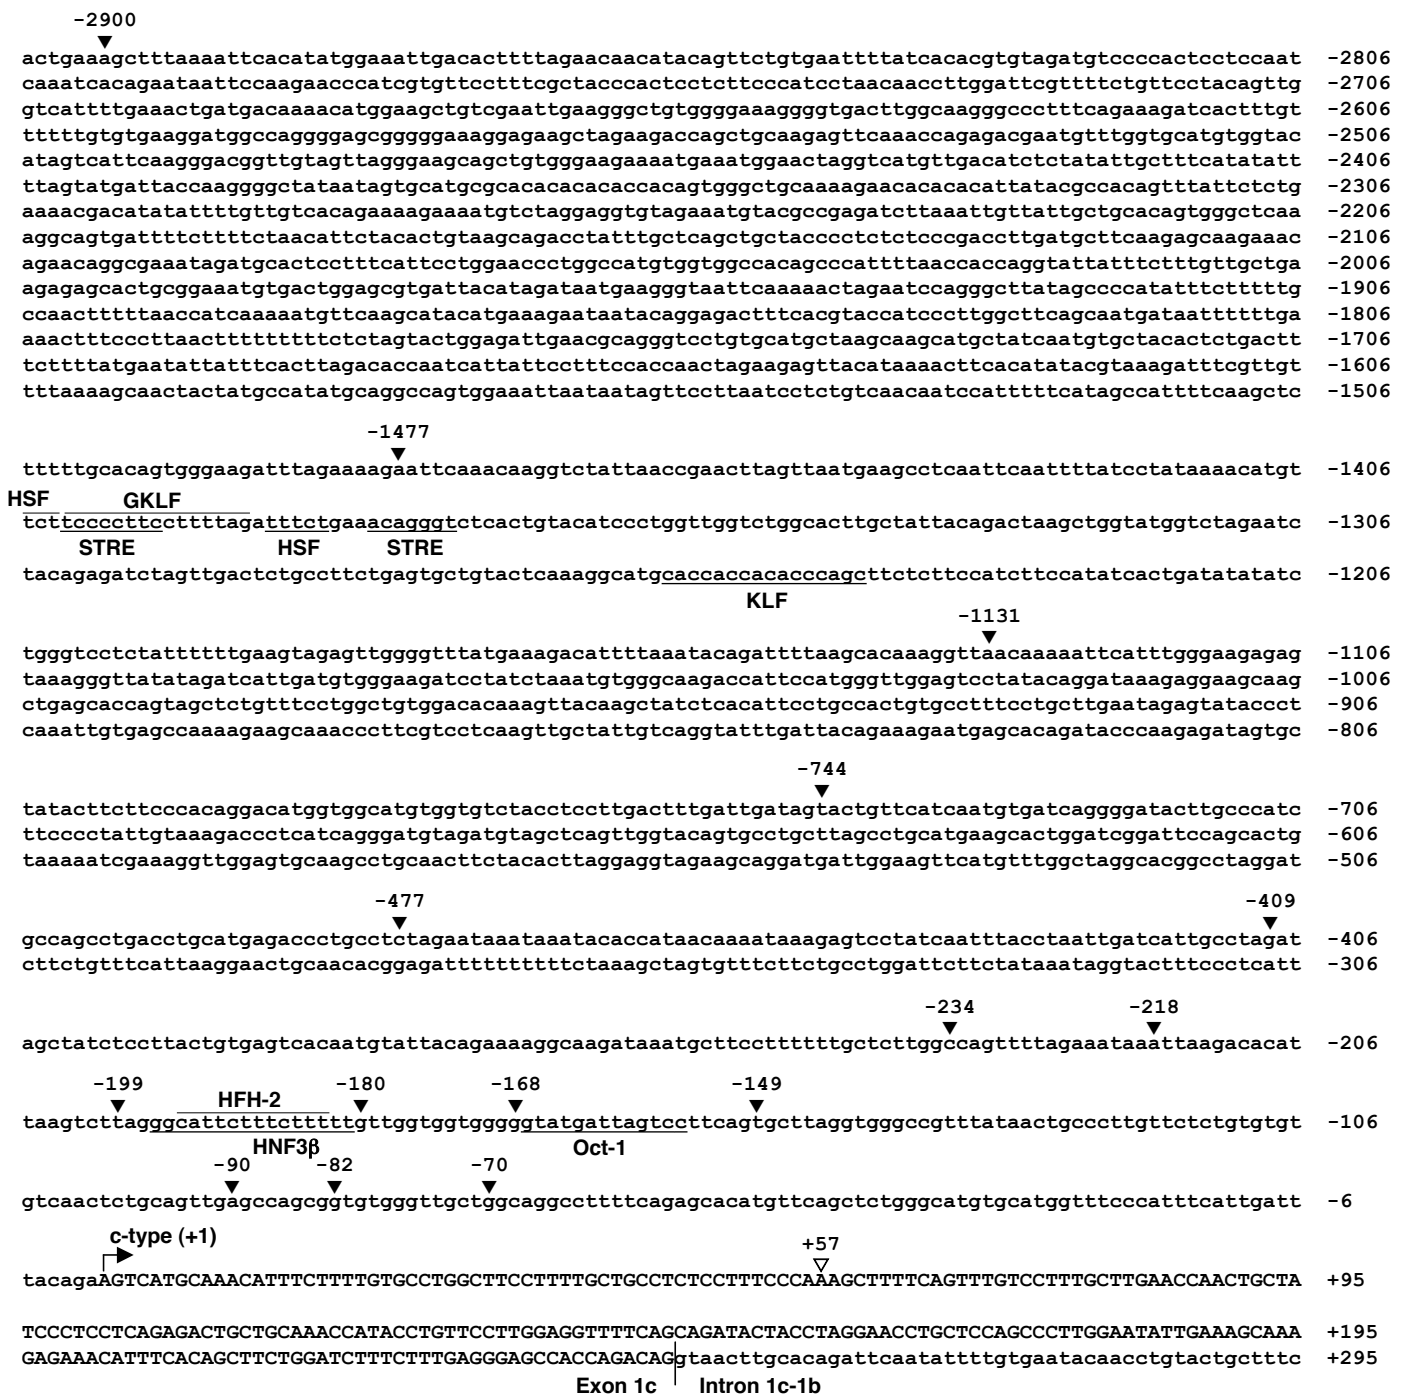

Online Figure IB. Arakawa et al.

C

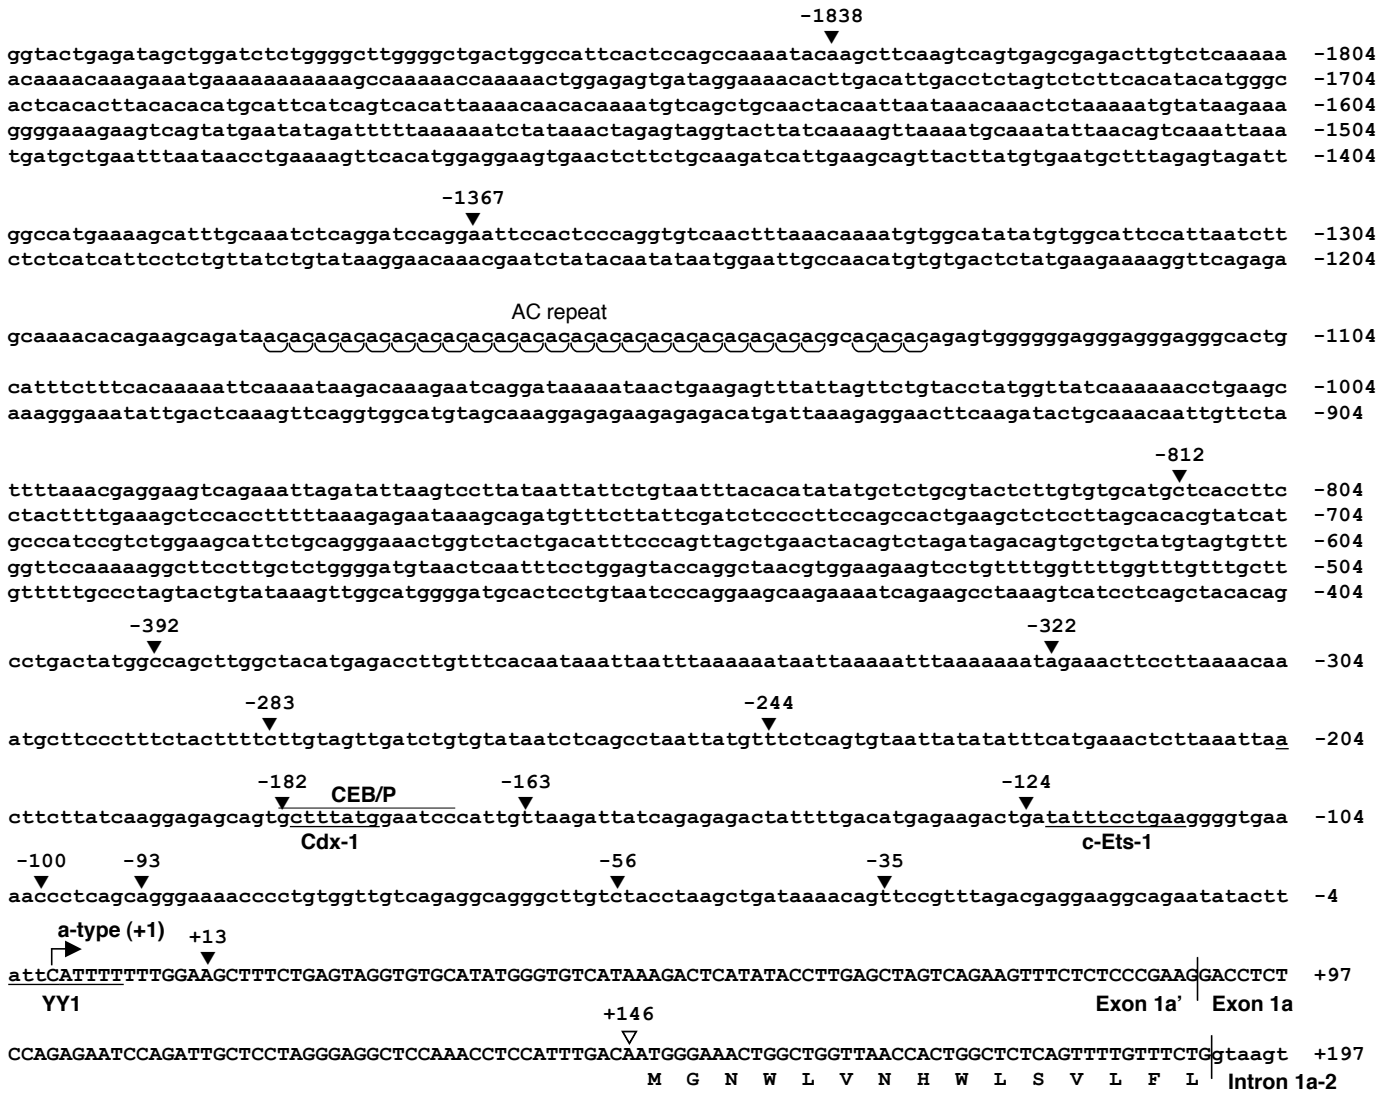

Online Figure IC. Arakawa et al.

## Legends for online data

**Fig. I. Promoter sequences of the mouse NOX1 gene.** The 5'-flanking sequences of the three NOX1 gene exons, 1f (*A*), 1c (*B*) and 1a' (*C*). The putative transcriptional start sites and nucleotide sequences of the exons are indicated by arrows and uppercase, respectively. The predicted binding sites for the major transcription factors are lined above or below. The 5'- and 3'- ends of the promoter constructs used for the reporter assay are denoted by closed and opened triangles, respectively.

## Online Tables

**Table 1. Primers and conditions applied for RT-PCR**

| Detection   | Primer Pair | Sequence (5'-3')             | Annealing (°C) | PCR cycles |
|-------------|-------------|------------------------------|----------------|------------|
| f-type      | exf/e-R     | CAGTCTCAATTACAGGGATCTTCATGG  | 58             | 48         |
|             | ex1/2-R     | TTCAGCCCCAACCCAGGAAACCAGAAAC |                |            |
| c-type      | ex1c-F      | AACCATACCTGTTCTTGAGG         | 61             | 41         |
|             | ex1/2-R     | TTCAGCCCCAACCCAGGAAACCAGAAAC |                |            |
| a-type      | ex1a'-F     | CTAGTCAGAAGTTTCTCTCCCGAAGGAC | 61             | 41         |
|             | ex4-R       | CATATATGCCACCAGCTTATGGAAG    |                |            |
| common      | ex1a-F      | GAGGCTCCAAACCTCCATTTGACA     | 61             | 41         |
|             | ex4-R       | CATATATGCCACCAGCTTATGGAAG    |                |            |
| MHC         | MHC-F       | ATGAGAAGAAAGCCAAGAGTC        | 60             | 34         |
|             | MHC-R       | CTCATCTAGCTCCCGCTGCAGC       |                |            |
| h-caldesmon | h-CaD-F     | GAGGCTGTGCTGATGGTATTGGAA     | 60             | 34         |
|             | h-CaD-R     | CTTCTCATCTTTGATCTCTTCCTTTCTG |                |            |
| l-caldesmon | l-CaD-F     | GCAAGAGGAAGAATCCTTGGGACA     | 60             | 34         |
|             | l-CaD-R     | GAATTCTCCATTCTGCGCCTTCAC     |                |            |
| GAPDH       | GAPDH-F     | TCAACGGGAAACCCATCACCAT       | 60             | 28         |
|             | GAPDH-R     | GAACACGGAAGCCATGCCAGT        |                |            |

**MHC, myosin heavy chain; GAPDH, glyceraldehyde-3-phosphate dehydrogenase.**

**Table 2. Exon/intron junction sequences of the mouse NOX1 gene**

| Exon | 5'-donor site | Intron (approx. size)              | 3'-acceptor site | Exon |
|------|---------------|------------------------------------|------------------|------|
| 1f   | TCTCAATTACAG  | gtgcgtac..... (36 k) .....tgaccag  | GGATCTTCATGG     | 1e   |
| 1e   | GGAGTGAAAGAG  | gtgggttt..... (42 k) .....acccaag  | GTTTAAGTTCTT     | 1d   |
| 1d   | ATACGACTGAAG  | gtaggtga..... (28 k) .....gacttaag | GCCTGCTTCCCC     | 1b   |
| 1c   | GCCACCAGACAG  | gtaacttg..... (25 k) .....gacttaag | GCCTGCTTCCCC     | 1b   |
| 1b   | GAGGCTCAAGAG  | gtaagtct..... (2.8k) .....tcccgaag | GACCTCTCAGA      | 1a   |
